# Supplementary material
Source: PubMed Central journal article supplement (PMC9038611)

## SUPPLEMENTAL MATERIAL

**Supplemental Table I: Machine Learning Reporting Guideline Checklist (MI-CLAIM<sup>16</sup>)**

| <b>Study Design (Part 1)</b>                                                                                                                                          | <b>Completed (page number)</b> | <b>Notes if not completed</b> |
|-----------------------------------------------------------------------------------------------------------------------------------------------------------------------|--------------------------------|-------------------------------|
| The clinical problem in which the model will be employed is clearly detailed in the paper.                                                                            | 7                              |                               |
| The research question is clearly stated.                                                                                                                              | 7                              |                               |
| The characteristics of the cohorts (training and test sets) are detailed in the text.                                                                                 | 6                              |                               |
| The cohorts (training and test sets) are shown to be representative of real-world clinical settings.                                                                  | 6                              |                               |
| The state-of-the-art solution used as a baseline for comparison has been identified and detailed.                                                                     | 6                              |                               |
| <b>Data and Optimization (Parts 2, 3)</b>                                                                                                                             | <b>Completed (page number)</b> | <b>Notes if not completed</b> |
| The origin of the data is described and the original format is detailed in the paper.                                                                                 | 5                              |                               |
| Transformations of the data before it is applied to the proposed model are described.                                                                                 | 6                              |                               |
| The independence between training and test sets has been proven in the paper.                                                                                         | 6                              |                               |
| Details on the models that were evaluated and the code developed to select the best model are provided.                                                               | 6                              |                               |
| Is the input data type structured or unstructured?                                                                                                                    | Unstructured                   |                               |
| <b>Model Performance (Part 4)</b>                                                                                                                                     | <b>Completed (page number)</b> | <b>Notes if not completed</b> |
| The primary metric selected to evaluate algorithm performance (e.g., AUC, F-score, etc.), including the justification for selection, has been clearly stated.         | 6                              |                               |
| The primary metric selected to evaluate the clinical utility of the model (e.g., PPV, NNT, etc.), including the justification for selection, has been clearly stated. | 7                              |                               |
| The performance comparison between baseline and proposed model is presented with the appropriate statistical significance.                                            | 7                              |                               |
| <b>Model Examination (Part 5)</b>                                                                                                                                     | <b>Completed (page number)</b> | <b>Notes if not completed</b> |
| Examination technique (sensitivity analysis)                                                                                                                          | 9, Supplemental Figure 2       |                               |

|                                                                                                                                                       |                                                                       |  |
|-------------------------------------------------------------------------------------------------------------------------------------------------------|-----------------------------------------------------------------------|--|
| A discussion of the relevance of the examination results with respect to model/algorithm performance is presented.                                    | 9-10                                                                  |  |
| A discussion of the feasibility and significance of model interpretability at the case level if examination methods are uninterpretable is presented. | 10                                                                    |  |
| A discussion of the reliability and robustness of the model as the underlying data distribution shifts is included.                                   | 10                                                                    |  |
| <b>Reproducibility (Part 6): choose appropriate tier of transparency</b>                                                                              | <b>Notes</b>                                                          |  |
| Tier 1: complete sharing of the code                                                                                                                  |                                                                       |  |
| Tier 2: allow a third party to evaluate the code for accuracy/fairness; share the results of this evaluation                                          |                                                                       |  |
| Tier 3: release of a virtual machine (binary) for running the code on new data without sharing its details                                            | We are working to host our software for access for research purposes. |  |
| Tier 4: no sharing                                                                                                                                    |                                                                       |  |

**Supplemental Table II: Sensitivity and Specificity at Varying DeepSymNet-v2 cutoffs**

| <b>DeepSymNet-v2 Probability Cutoff</b> | <b>Sensitivity</b> | <b>Specificity</b> |
|-----------------------------------------|--------------------|--------------------|
| <b>0.95</b>                             | 98%                | 31%                |
| <b>0.80</b>                             | 95%                | 50%                |
| <b>0.65</b>                             | 88%                | 69%                |
| <b>0.57</b>                             | 76%                | 73%                |

**Supplemental Figure I. DeepSymNet-v2 performance for LVO detection on in-hospital testing dataset. ROC curve with AUC and 95% confidence intervals.**

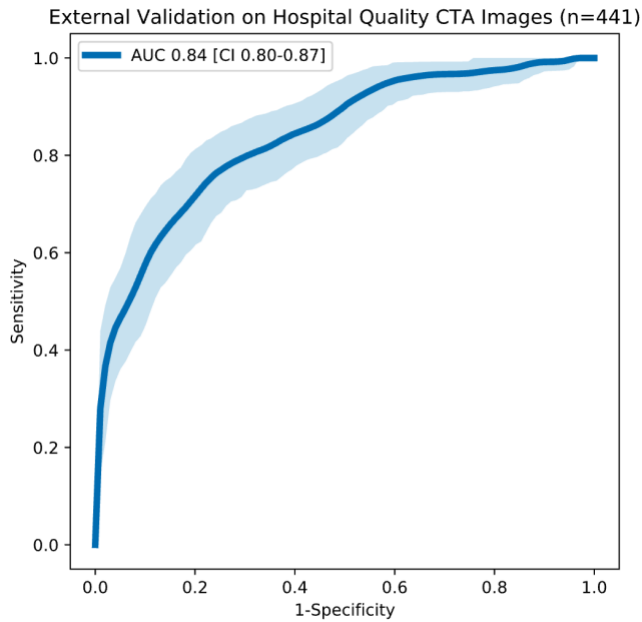

**Supplemental Figure II. DeepSymNet-v2 performance for LVO detection in the two MSU cohorts. ROC curves with AUC curves and 95% confidence intervals. UTH represents the Houston cohort and UCLA represents the Los Angeles based cohort.**

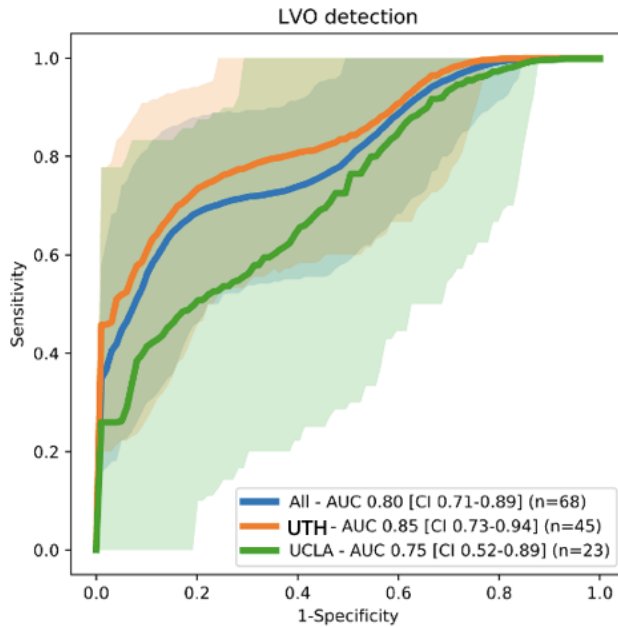

Supplement: NIHMS1756323-supplement-Supplemental_Material.pdf [file NIHMS1756323-supplement-Supplemental_Material.pdf]
